# Supplementary material for: Plant functional traits and vegetation structure explain pollination networks at scale
Source: Research Square preprint supplement (doi:10.21203/rs.3.rs-5522309/v1), 2024-12-20
Supplement: Supplementary file 1 [file 0b2d3daa9f37ba099a9305c5.xlsx]

## Sheet: Sheet1
Trait	Units	Description	Relevance
Maximum assimilation rate (Amax)	µmol/m2/s	Relating to photosynthetic processes, this variable describes the light-saturated maximum rates of net photosynthesis at saturated CO2 (2000 ppm).	This variable describes the capacity of leaves for photosynthesis. It is higher for species that experience a high turnover of resources, like deciduous trees. A high maximum assimilation rate often means a larger presence of such species.
Saturated assimilation rate (Asat)	µmol/m2/s	Relating to photosynthetic processes, this variable describes the light-saturated rates of net photosynthesis at ambient CO2 (400 ppm).	This variable also describes the capacity of leaves for photosynthesis, but then at ambient levels of CO2 concentration.
Leaf dry mass (DM)	g	Relating to morphology and structure, this variable describes the weight of oven-dried leaves.	These two variables give an indication of a plant’s ‘biomass investment’, which depends on the species mix and the environment. Overall, droughts are believed to negatively affect dry mass and fresh mass.
Leaf fresh mass (FM)	g	Relating to morphology and structure, this variable describes the weight of fresh leaves.
Leaf thickness (Th)	mm	Relating to morphology and structure, this variable describes the thickness of leaves.	Thicker leaves have less water transpiration, so water-limited environments tend to have plants with thicker leaves, though thick leaves require higher effort to construct. Deciduous species have thinner leaves overall, so the species mix impacts the value of leaf thickness.
Specific leaf area (SLA)	cm	Relating to morphology and structure, this variable describes the ratio of leaf area to leaf dry mass	Specific leaf area is important for photosynthetic capacity, with more acquisitive plants having a higher SLA. Specific leaf area generally decreases in later successional stages.
Leaf water content (WC)	%	Relating to morphology and structure, this variable describes the water content per unit weight, calculated by comparing the fresh–dry mass difference to fresh mass.	Higher water content values are associated with wetter environments, and are thought to boost productivity. Water stress however, which limits photosynthetic capacity and therefore productivity, is characterised by lower water content.
Wood density (WD)	g/cm3	Relating to morphology and structure, this variable describes the dried mass per unit volume.	This variable touches on the ‘strength’ of a plant, with higher wood density values found in areas with woodier plants. In general, wood density is expected to be higher in drier areas.
Leaf nitrogen content (N)	%	Relates to leaf chemistry	A crucial nutrient, restrictions on N limit photosynthetic capacity and growth – especially in drier environments. N is expected to decrease with higher temperature and droughts. Soil N fixation in tropical forests is shown to be higher in rainy compared to dry seasons (Reed et al. 2007). Nitrogen use is thought to increase linearly with temperature (Hu et al. 2024), but the relationships between…
Leaf phosphorus content (P)	%	Relates to leaf chemistry	Like nitrogen, P deficiency determines productivity limits, yet its availability is more linked to soil properties.
Leaf carbon content (C)	%	Relates to leaf chemistry	Varies more with the ‘life form’ of plants than with climate, with woody plants (and coniferous species overall) having higher levels of C (Ma et al. 2018).
Leaf calcium content (Ca)	%	Relates to leaf chemistry	While leaf N and P are associated with plant growth, leaf Ca and Mg are related to plant structure, playing an important role in cell walls. Leaf calcium content plays an important role in regulating plant water use efficiency (Oulehle et al. 2023) and determines digestability of plant matter, along with Mg (Mládková et al. 2018). Leaf calcium content is also affected by soil, increasing with soi…
Leaf potassium content (K)	%	Relates to leaf chemistry	Helps regulate internal hydraulics, and is linked to soils. K deficiency can limit growth, where K deficiency is expected to increase with drought.
Leaf magnesium content (Mg)	%	Relates to leaf chemistry	Mg is closely tied to plant biomass and cell wall structure, with ‘adequate’ Mg supply raising Asat with up to 140%, leading to a 61% biomass increase (Hauer-Jakli & Trankner 2019). Thus, Mg also regulates plant growth.
Evenness of Plant Area Index (PAI)	m-1	Relates to vegetation structure	The plant area index describes the how vegetation is distributed vertically. Derived from L2B 1 m vertical Plant Area Index profile (m-1), this metric captures how evenly vegetation is distributed vertically in space. Evenness of the PAI is calculated as: fhd_normal / log(ceiling(rh100)), where ‘fhd_normal’ describes the foliage height diversity. GEDI metric name: even-pai-1m-a0
Canopy height (rh98)	m	Relates to vegetation structure	Derived from the GEDI L2A, this metric describes the relative height at the 98th percentile of returned energy, which acts as a proxy for canopy height GEDI metric name: rh-98-a0
Plant area volume density (PAVD), bottom fraction	unitless	Relates to vegetation structure	Derived from the GEDI L2B PAVD profile, this metric describes the fraction of PAVD in the bottom half of the canopy. GEDI metric name: pavd-bot-frac
Aboveground biomass density (ABG)	Mg ha	Relates to vegetation structure	Derived from GEDI L4B, this is a measure of mean aboveground biomass density in 1km grid cells. This gridded product is available as a raster on Google Earth Engine.
