# Supplementary material for: Plant functional traits and vegetation structure explain pollination networks at scale
Source: Research Square preprint supplement (doi:10.21203/rs.3.rs-5522309/v1), 2024-12-20
Supplement: Supplementary file 1 [file a44bfa8552fd2c9f8b6a3eb5.pdf]

| Country  | Site          | Study           | Year        | Network type       | Habitat                      | Times sampled | Reference                                                                                         |
|----------|---------------|-----------------|-------------|--------------------|------------------------------|---------------|---------------------------------------------------------------------------------------------------|
| Kenya    | JN            | Baldock         | 2004        | All visitors       | Savanna                      | 3             | <a href="https://doi.org/10.1890/10-1110.1">https://doi.org/10.1890/10-1110.1</a>                 |
| Kenya    | TB            | Baldock         | 2004        | All visitors       | Savanna                      | 4             |                                                                                                   |
| Brazil   | Cedro         | Carstensen      | 2012        | All species        | Cerrado                      | 6             | <a href="https://doi.org/10.1111/oik.04436">https://doi.org/10.1111/oik.04436</a>                 |
| Brazil   | Elefante      | Carstensen      | 2012        | All species        | Cerrado                      | 6             |                                                                                                   |
| Brazil   | Gigante       | Carstensen      | 2012        | All species        | Cerrado                      | 6             |                                                                                                   |
| Brazil   | Midway        | Carstensen      | 2012        | All species        | Cerrado                      | 7             |                                                                                                   |
| Brazil   | Paulino       | Carstensen      | 2012        | All species        | Cerrado                      | 6             |                                                                                                   |
| Brazil   | Soizig        | Carstensen      | 2012        | All species        | Cerrado                      | 6             |                                                                                                   |
| Brazil   | Tinkerbell    | Carstensen      | 2012        | All species        | Cerrado                      | 6             |                                                                                                   |
| Tanzania | cof3          | Classen         | 2011 - 2012 | All species        | Shaded coffee plantation     | 6             | <a href="https://doi.org/10.1002/ece3.6056">https://doi.org/10.1002/ece3.6056</a>                 |
| Tanzania | flm1          | Classen         | 2011 - 2012 | All species        | Lower montane forest         | 3             |                                                                                                   |
| Tanzania | foc1          | Classen         | 2011 - 2012 | All species        | Ocotea forest                | 3             |                                                                                                   |
| Tanzania | fpd2          | Classen         | 2011 - 2012 | All species        | Podocarpus forest, disturbed | 1             |                                                                                                   |
| Tanzania | fpo1          | Classen         | 2011 - 2012 | All species        | Podocarpus forest            | 2             |                                                                                                   |
| Tanzania | gra1          | Classen         | 2011 - 2012 | All species        | Grassland                    | 7             |                                                                                                   |
| Tanzania | gra2          | Classen         | 2011 - 2012 | All species        | Grassland                    | 5             |                                                                                                   |
| Tanzania | gra3          | Classen         | 2011 - 2012 | All species        | Grassland                    | 4             |                                                                                                   |
| Tanzania | gra4          | Classen         | 2011 - 2012 | All species        | Grassland                    | 4             |                                                                                                   |
| Tanzania | gra5          | Classen         | 2011 - 2012 | All species        | Grassland                    | 3             |                                                                                                   |
| Tanzania | sav4          | Classen         | 2011 - 2012 | All species        | Savanna                      | 6             |                                                                                                   |
| Brazil   | Cerrado A INV | Guariglia Perez | 2014        | All flying insects | Cerrado                      | 1             | unpublished*                                                                                      |
| Brazil   | Cerrado B INV | Guariglia Perez | 2014        | All flying insects | Cerrado                      | 2             |                                                                                                   |
| Brazil   | Cerrado C INV | Guariglia Perez | 2014        | All flying insects | Cerrado                      | 3             |                                                                                                   |
| Brazil   | Cerrado D INV | Guariglia Perez | 2014        | All flying insects | Cerrado                      | 4             |                                                                                                   |
| Kenya    | N. 1_control  | Guy             | 2014        | All visitors       | Semi-arid savanna            | 1             | <a href="https://doi.org/10.1016/j.cub.2021.04.051">https://doi.org/10.1016/j.cub.2021.04.051</a> |
| Kenya    | N. 1_LMH      | Guy             | 2014        | All visitors       | Semi-arid savanna            | 1             |                                                                                                   |
| Kenya    | N. 2_control  | Guy             | 2014        | All visitors       | Semi-arid savanna            | 1             |                                                                                                   |
| Kenya    | N. 2_LMH      | Guy             | 2014        | All visitors       | Semi-arid savanna            | 1             |                                                                                                   |
| Kenya    | N. 3_control  | Guy             | 2014        | All visitors       | Semi-arid savanna            | 1             |                                                                                                   |
| Kenya    | N. 3_LMH      | Guy             | 2014        | All visitors       | Semi-arid savanna            | 1             |                                                                                                   |
| Kenya    | S. 1_control  | Guy             | 2014        | All visitors       | Semi-arid savanna            | 1             |                                                                                                   |
| Kenya    | S. 1_LMH      | Guy             | 2014        | All visitors       | Semi-arid savanna            | 1             |                                                                                                   |

|                     |                       |                   |             |              |                         |    |                                                                                                         |
|---------------------|-----------------------|-------------------|-------------|--------------|-------------------------|----|---------------------------------------------------------------------------------------------------------|
| Kenya               | S. 2_Control          | Guy               | 2014        | All visitors | Semi-arid savanna       | 1  |                                                                                                         |
| Kenya               | S. 2_LMH              | Guy               | 2014        | All visitors | Semi-arid savanna       | 1  |                                                                                                         |
| Kenya               | S. 3_control          | Guy               | 2014        | All visitors | Semi-arid savanna       | 1  |                                                                                                         |
| Kenya               | S. 3_LMH              | Guy               | 2014        | All visitors | Semi-arid savanna       | 1  |                                                                                                         |
| Seychelles          | Ber                   | Kaiser-Bunbury    | 2007 - 2008 | All visitors | Inselberg vegetation    | 8  |                                                                                                         |
| Seychelles          | Cas                   | Kaiser-Bunbury    | 2007 - 2008 | All visitors | Inselberg vegetation    | 8  |                                                                                                         |
| Seychelles          | Cop                   | Kaiser-Bunbury    | 2007 - 2008 | All visitors | Inselberg vegetation    | 8  |                                                                                                         |
| Seychelles          | Res                   | Kaiser-Bunbury    | 2007 - 2008 | All visitors | Inselberg vegetation    | 8  | <a href="https://doi.org/10.1111/j.1365-2745.2010.01">https://doi.org/10.1111/j.1365-2745.2010.01</a>   |
| Seychelles          | Tea                   | Kaiser-Bunbury    | 2007 - 2008 | All visitors | Inselberg vegetation    | 8  |                                                                                                         |
| Seychelles          | Tro                   | Kaiser-Bunbury    | 2007 - 2008 | All visitors | Inselberg vegetation    | 8  |                                                                                                         |
| Mauritius           | CMA                   | Kaiser-Bunbury    | 2003 - 2004 | All visitors | Upland heath            | 12 | <a href="https://doi.org/10.1016/j.ppees.2009.04.001">https://doi.org/10.1016/j.ppees.2009.04.001</a> , |
| Mauritius           | Control               | Kaiser-Bunbury    | 2003 - 2004 | All visitors | Upland heath            | 12 | <a href="https://doi.org/10.1111/j.1461-0248.2009.01">https://doi.org/10.1111/j.1461-0248.2009.01</a>   |
| Brazil              | Fazenda Nao me Deixes | Pacheco Filho     | 2011 - 2012 | Bees         | Caatinga                | 12 | 10.1007/s13592-014-0344-8                                                                               |
| Ecuador (Galapagos) | Fernandina            | Traveset & Heleno | 2010 - 2011 | All visitors | Dry, rocky litoral zone | 2  |                                                                                                         |
| Ecuador (Galapagos) | Pinta                 | Traveset & Heleno | 2010 - 2011 | All visitors | Dry, rocky litoral zone | 4  |                                                                                                         |
| Ecuador (Galapagos) | San_Cristobal         | Traveset & Heleno | 2010 - 2011 | All visitors | Dry, rocky litoral zone | 10 | <a href="https://doi.org/10.1098/rspb.2012.3040">https://doi.org/10.1098/rspb.2012.3040</a>             |
| Ecuador (Galapagos) | Santa_Cruz            | Traveset & Heleno | 2010 - 2011 | All visitors | Dry, rocky litoral zone | 8  |                                                                                                         |

\*Methods descriptions for Cerrado sites A, B, C, and D INV: The plot was located in a cerrado fragment and with more than 100m from the edge to minimize edge effects. The plot had a rectangular shape of 10 by 120 meters, divided into 12 sub-plots with 10 by 10 meters. Flowering species in each of the 12 sub-plots were sampled from 8 to 12 am, with each plant observed for 1 hour. To reduce morning temporal variation in temperature and light, the 1-hour observations were split into 15-minute intervals, alternating between plants. For species with more than one individual in the same sub-plot, the plant with the highest number of open flowers was observed. Plant branches were also collected for later identification. Sampling was carried out on winter (south hemisphere) and in sunny and low-wind days, as we observed that rain and strong winds affect the behavior of floral visitors. It was also observed that flowers from the same plant exposed to sunlight attracted more visitors than those in the shade, so priority was given to flowers in direct sunlight. Floral visitors that made legitimate visits by contacting both the male and female flower parts were captured with entomological nets and later identified to the species or morphospecies level. Nectar robbers and non-flying organisms, as well as mammals and birds were not included.
