# Supplementary material for: Plant functional traits and vegetation structure explain pollination networks at scale
Source: Research Square preprint supplement (doi:10.21203/rs.3.rs-5522309/v1), 2024-12-20
Supplement: Supplementary file 2 [file df01fe808fd4f6583113ad47.xlsx]

## Sheet: Sheet1
Network metric	Predictor	Estimate	CI	Marginal R2	Conditional R2
Connectance	(Intercept)	-0.06	-0.15 – 0.03	0.21	0.75
	WC mean	0.03	0.00 – 0.06
	Asat mean	0.02	0.00 – 0.04
	Method [Timed observations]	0.02	-0.09 – 0.14
	Network size	-0.01	-0.02 – -0.00
	Sampling effort	0	-0.00 – 0.01
Modularity	(Intercept)	0.22	0.14 – 0.29	0.29	0.39
	Method [Timed observations]	-0.25	-0.36 – -0.13
	rh98 mean	-0.09	-0.13 – -0.05
	Asat mean	-0.05	-0.09 – -0.00
	P mean	-0.04	-0.08 – 0.00
	Th mean	0.03	-0.01 – 0.06
	Network size	-0.01	-0.04 – 0.03
	Sampling effort	-0.01	-0.03 – 0.02
Nestedness	(Intercept)	-0.07	-0.17 – 0.02	0.42	0.46
	SLA stdDev	0.05	0.01 – 0.08
	Method [Timed observations]	0.05	-0.10 – 0.20
	Network size	-0.01	-0.03 – 0.01
	Sampling effort	-0.01	-0.04 – 0.03
	WC mean	0.03	-0.00 – 0.07
	rh98 mean	0.02	-0.01 – 0.04
	Ca mean	0.03	0.01 – 0.05
Specialisation (H2')	(Intercept)	0.69	0.56 – 0.82	0.38	0.5
	N mean	-0.13	-0.23 – -0.03
	P mean	0.14	0.03 – 0.25
	rh98 mean	-0.07	-0.13 – -0.00
	Method [Timed observations]	0.02	-0.18 – 0.22
	Sampling effort	-0.01	-0.03 – 0.02
	Network size	-0.03	-0.07 – 0.01
	Asat mean	0.08	0.03 – 0.13
	Ca mean	-0.05	-0.14 – 0.03
	PAVD mean	0.04	-0.01 – 0.09
